# Supplementary material
Source: PubMed Central journal article supplement (PMC4056651)
Supplement: jn.114.192187_nutrition192187SupplementaryData1.pdf [file jn.114.192187_nutrition192187SupplementaryData1.pdf]

Online Supporting Material

**SUPPLEMENTAL TABLE 1** Oligonucleotide primers used for quantitative real-time PCR

| Gene <sup>1</sup> | Sequence                       | F/R <sup>2</sup> | Template |
|-------------------|--------------------------------|------------------|----------|
| ALB               | 5'-CTTGAATGTGCTGATGACAGG-3'    | F                | cDNA     |
|                   | 5'-GCAAGTCAGCAGGCATCTCAT-3'    | R                |          |
| ALB               | 5'-TACATTGACAAGGTCTTGTGGAG-3'  | F                | gDNA     |
|                   | 5'-TGGGGTTGACAGAAGAGAAAAGC-3'  | R                |          |
| GAPDH             | 5'-TCCACTGGCGTCTTCACC-3'       | F                | cDNA     |
|                   | 5'-GGCAGAGATGATGACCCTTT-3'     | R                |          |
| GAPDH             | 5'-ATGACAAGCATGAGGCAGAG-3'     | F                | gDNA     |
|                   | 5'-CAACCAGGACCGTTAACCCTTTCT-3' | R                |          |
| LSD1              | 5'-ACCACAACAGACCCAGAAGG-3'     | F                | cDNA     |
|                   | 5'-GGTGCTTCTAATTGTTGGAGAG-3'   | R                |          |

<sup>1</sup>Genbank entries: ALB = *Homo sapiens albumin* (NM\_000477.5); GAPDH = *Homo sapiens glyceraldehyde-3-phosphate dehydrogenase* (NM\_002046.4 for complementary DNA, NG\_007073.2 for genomic DNA); LSD1 = *Homo sapiens lysine (K)-specific demethylase 1* (NM\_001009999.2).

<sup>2</sup>Abbreviations: cDNA, complementary DNA (for gene expression analysis); F, forward; gDNA, genomic DNA (for ChIP assays); R, reverse.
